# Supplementary material
Source: Springer Nature journal article supplement (https://www.springermedizin.de/resource/supplementary/12890_2014_627_MOESM4_ESM.pdf/9505444)

## A Body mass of mice treated with sActRIIB-Fc

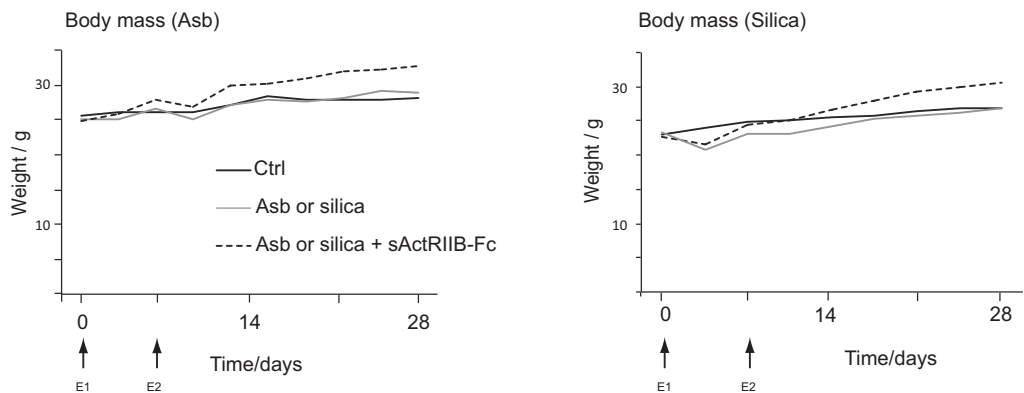

## B Muscle mass of mice treated with sActRIIB-Fc

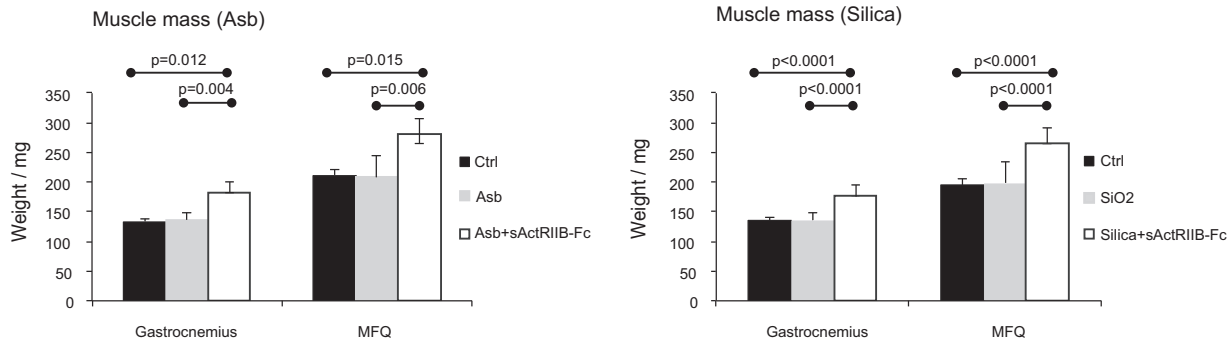

## C Altered epididymal fat mass in mice treated with sActRIIB-Fc

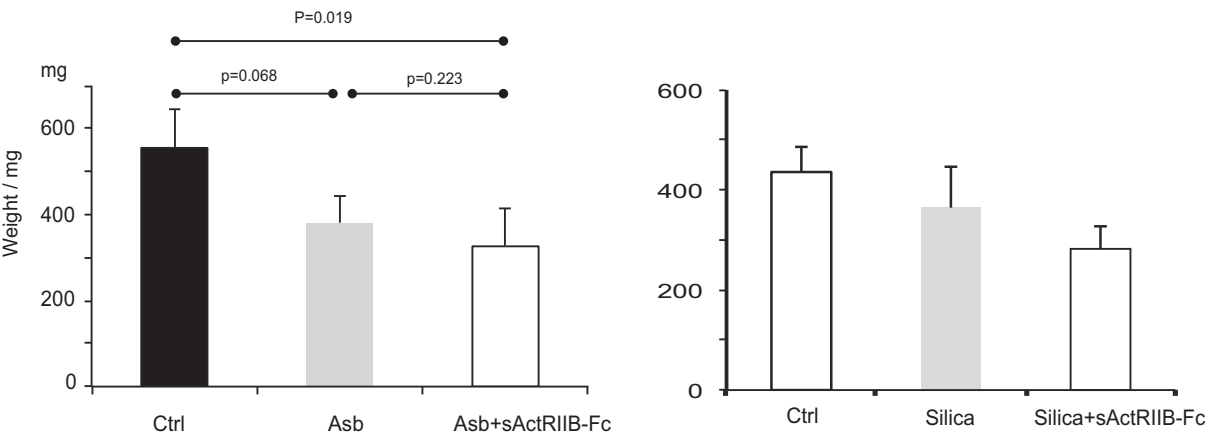

Supplement: MOESM4 [file 9505444]
